# Supplementary material
Source: PubMed Central journal article supplement (PMC5910662)
Supplement: mmc1.pdf [file mmc1.pdf]

**YMTHE, Volume 26**

**Supplemental Information**

**Hepatocyte Growth Factor Improves  
the Therapeutic Efficacy of Human Bone  
Marrow Mesenchymal Stem Cells via RAD51**

**Eun Ju Lee, Injoo Hwang, Ji Yeon Lee, Jong Nam Park, Keun Cheon Kim, Gi-Hwan Kim, Chang-Mo Kang, Irene Kim, Seo-Yeon Lee, and Hyo-Soo Kim**

Figure S 1

Determine of HGF concentration and validation of HGF effect in hE-MSC

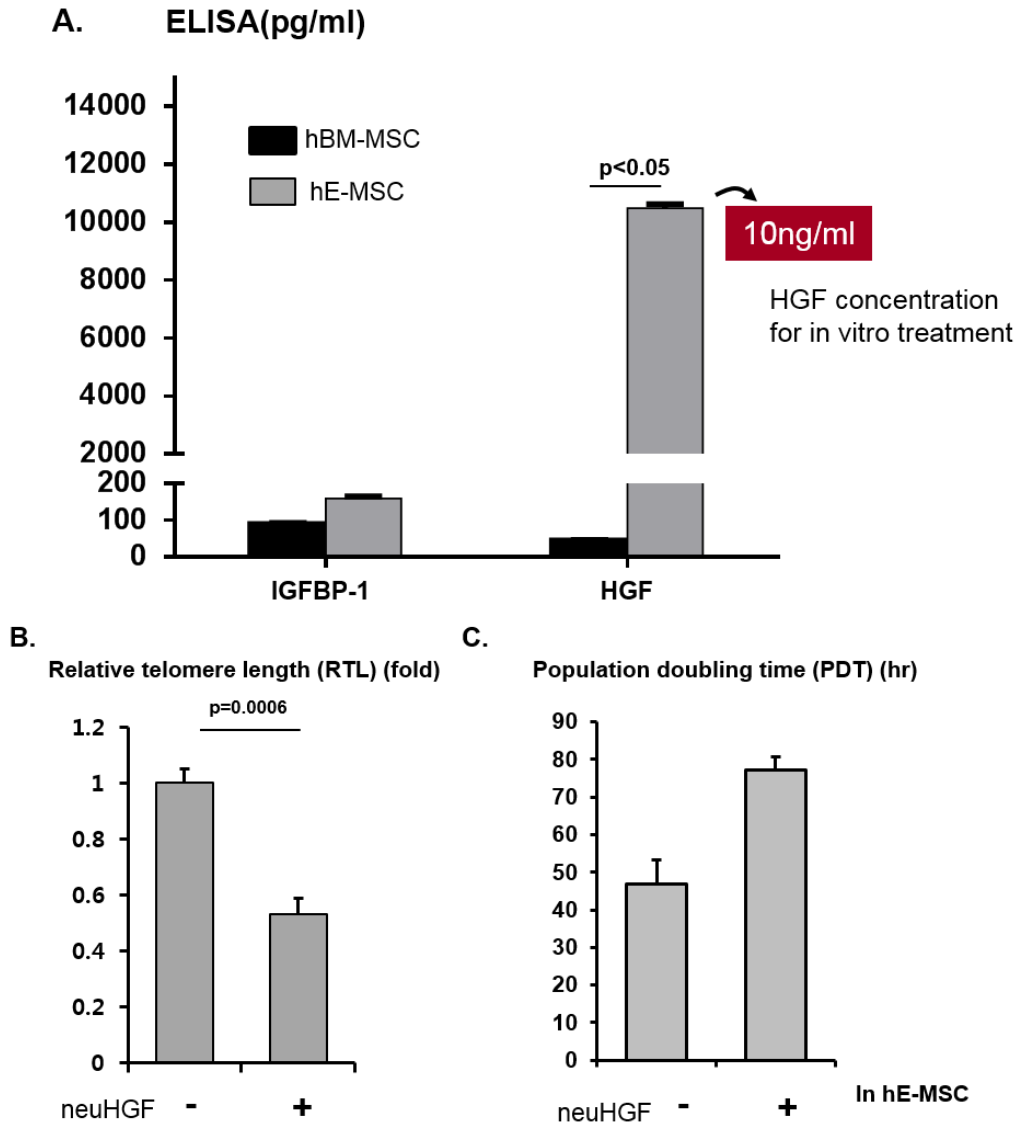

**A** ELISAs of HGF and IGFBP1 secretion by hBM-MSCs and hE-MSCs. The HGF concentration in the culture supernatant of hE-MSCs was 10 ng/mL, which was significantly higher than that in the culture supernatant of hBM-MSCs. The IGFBP1 concentration did not significantly differ between the two cell types.

**B** Determination of RTL by real-time PCR. Loss of HGF function in hE-MSCs by treatment with a HGF neutralizing antibody decreased telomere length and the cell number.

**C** PDT was increased in hE-MSCs treated with a HGF neutralizing antibody.

Figure S 2

**Validation of RAD51 in hE-MSC.**

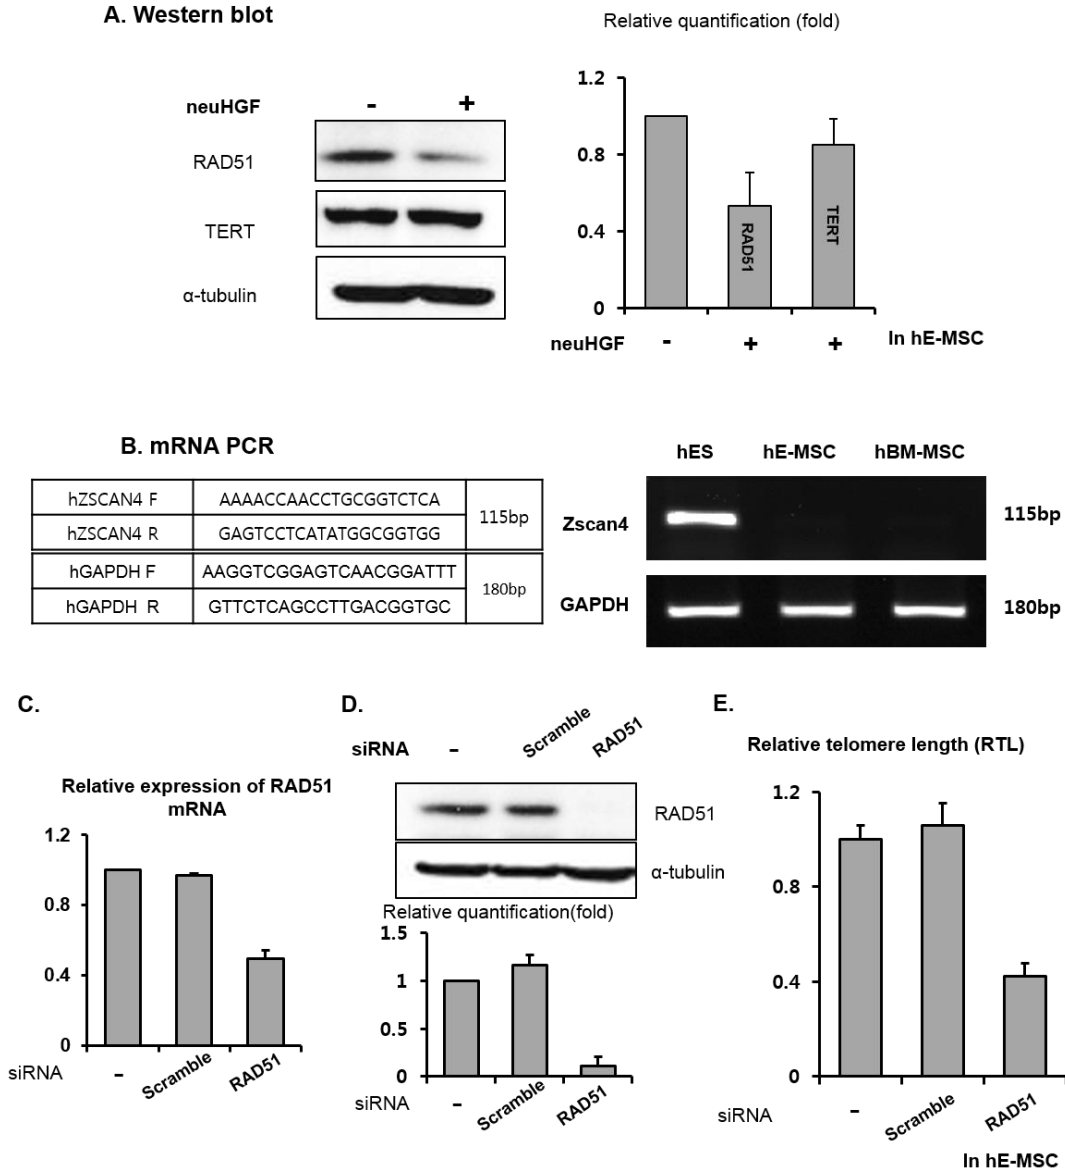

**A** Western blotting demonstrated that protein expression of RAD51 in hE-MSCs was reduced by neutralization of HGF, while that of TERT was not changed.

**B** RT-PCR to check Zscan4 expression in hE-MSCs and hBM-MSCs. Human embryonic stem cells (hES) were used as a positive control.

**C** Real-time PCR analysis of RAD51 mRNA expression in siRAD51-transfected hE-MSCs.

**D** Western blot analysis of RAD51 protein expression in siRAD51-transfected hE-MSCs.

**E** RTL was decreased following RAD51 knock-down.

Figure S3

Promoter analysis of RAD51 and validation of IKF1 and RUNX1 in hE-MSC

A. Exon-intron organization of human RAD51.

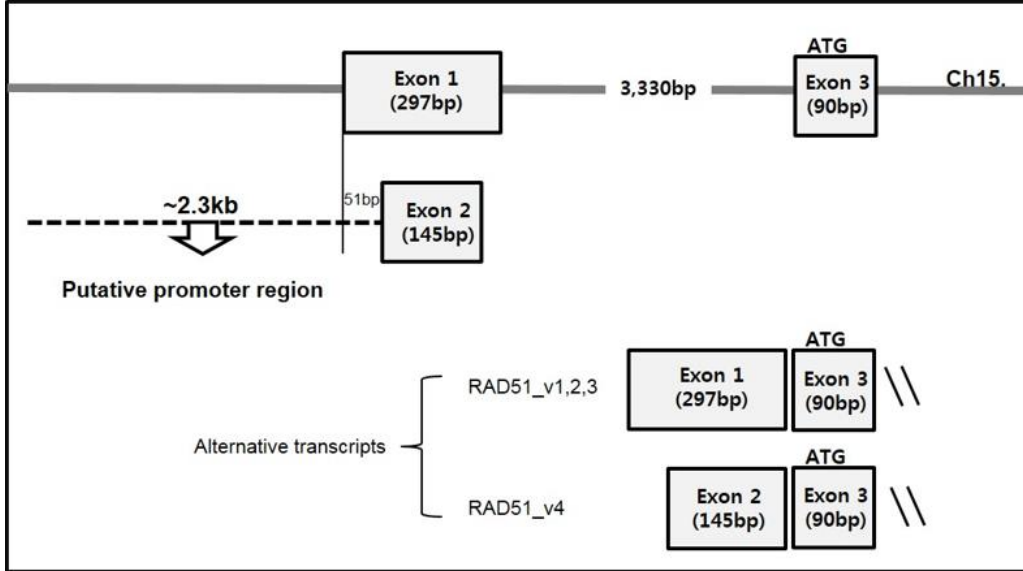

```

taaataata aataataaa taaaaataa aataaattg taagtggagg gaaaatagat ctaaccaat gactgtctt cttaaaaact tcaatgatt ctcagtacc tagagacca -1881
agctccttac cttttttt ttttttga cggagcttg cctgttgc caggctggag tgcagtgcg tgatctcgt cactgcaac tccacctccc gggttcaagc acttctctgc -1761
ctcaaccttc caaaagagctg ggattacagg catgcaccac cacgccggc taattttgt agttttagta gagatgggg tttgccatc tggccaggct ggtcttgaac tectgacctc -1641
IKZF1
gtgatccgc cactttgac tcccagggt ctgggattac aggettgagc caccgcgct gccctctct tacatgttt gttgtgtgc cttgtttt gagacaagg ctactctgt -1521
IKZF1
agcccaggct ggagtcagt ggccatcat agctcactg agcttgagc tectgagtc aagcagtc cccacctag cctccggat agctgagacc acaggcaca gccaccagc -1401
ccagcttatt tttttttt ttttttga gataggggt cccaatgtg tggccaggct ggtctcaac tectgagtc aagcagtc cccccactt ggcttccaa agtgtctgga -1281
ttacagggtg gagccaccg gcaggccta tatgatctc atactctgaa ctaaagttaa cttccagtt tcggcactg cctcggact tttctctcc gcagagataa tactaatct -1161
taatcatgta gttcgttcc atgcccatac tacctattt gcttataatg tcttccact gcaccaagaa tcctactca gtagctgat gttgtttt tgacacagc tgcctctgtc -1041
RUNX1
gcccaggctg gactgacagc gcgagatct ggttgctgc aacctctcc tgagttcaag cgattctat gcctcagct ttcgagtagc taggattaca ggcagtgcc acaaaacctg -921
gctaatttt gtaatttta ctaaagaca ggtttacca cgttgccag gttattctc aacctctgac ctgagtgat ccgctctct tggcctcta aactgctggg attactggcg -801
tgaaccaccg ccgccggccc tactcagctc taaaaccgg aatcaggggt caaaacttc tgtaaacca cgatcgggt taggtatga aattcaatgc cccctctctc tgaactctcg -681
caaatctcca gtaaagcacc acagattgac gaattctca gccatttccc tctccctgac gctagctca tttccactt ctatcatct tctcagctt cctcagctcc tccactctca -561
tgaggcctg aaagcactt gctccaggaa tgcgagtagg aggtcagag cgaccagaag tgccaaaagc tgacattcag atactgccg aacaaaccac aagagcgtc gggccccgcg -441
taatagcca gctgcgatg tgagaactcg cggaccgcc ggcgatgat gccgggagat gtagtcccg gccgacgat tacctcttg gagtcgtgt cttcagctg gtaaacagaa -321
gacggcaact cggttaagtc tttccccacc cccccctgaa atcctcgc caaccgcga ggaactggg taggagtagg ggcgttgcg tggtagctc cgaactctc ggctcagacg -201
atactctgc ctcggctcc cgagcagctg ggactacag cgtgagccac cgccccgcg ataaagttg aattagctc tarcgaaaaa gggaagaggg cagctctgaa actcgcagcag -81
RAD51_v1,2,3 transcription start point (0)
gatcaagctc tcgagctccc gttctgggt agcgcgagg gcggaagcgg ggagaagcgg gatccgggag gcggggatac gttactcga cgcgggcgtg accctgggcg agaggggttg +39
RAD51_v4 transcription start point (+51)
gcgggaatic tgaagccgc tggcggaccg cgcgcagcgg ccagagaccg agcctaagg agagtgccgc gcttcccgag gcgtgcagct gggaaactgca actcatctgg gttgtgcgca +159
gaaggctggg gcaagcagat agagaagtgg agcglaaacc aggggcgttg ggggcccgtc gggctgggcy cgtgccacgc ccgccccgtg aagtcggagc gcggggcctg ctggagagag +279
gagcctctcg gaccgactg agtgtgtgag gcgcagg
2320kb
    
```

Figure S 3continued

**B. Real time cDNA PCR**

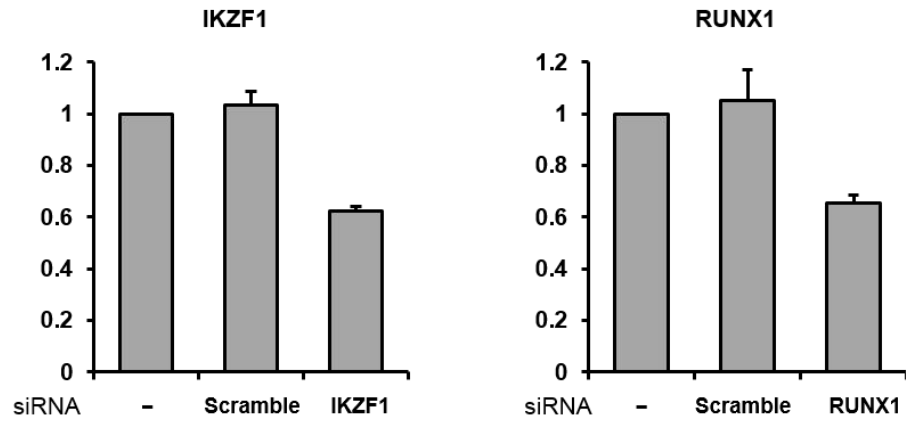

**C. Western blot**

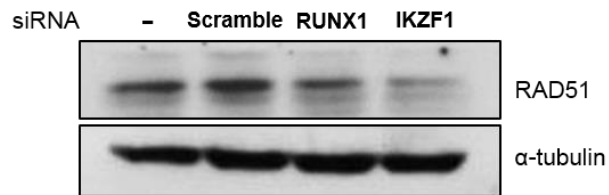

**D. Relative telomere length (RTL) by Real time gDNA PCR**

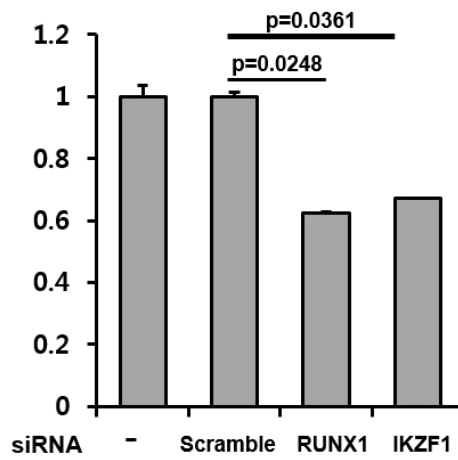

In hE-MSC

- A** Exon-intron organization of human RAD51. Four alternative transcripts of RAD51 were arranged and the putative promoter region of RAD51 was identified. Screening for transcriptional activators that bind to the putative promoter region of RAD51. IKZF1- and RUNX1-binding sites were identified using a transcription factor-binding site analysis program (TFSEARCH V1.3 database).
- B** IKZF1 or RUNX1 mRNA knock-down was validated by real-time PCR.
- C** Western blot analysis of the RAD51 protein level following knock-down of each gene.  $\alpha$ -tubulin was used as an endogenous control.
- D** RTL was decreased following RUNX1 or IKZF1 knock-down.

Figure S 4

In BM-MSC

A. Western blotting

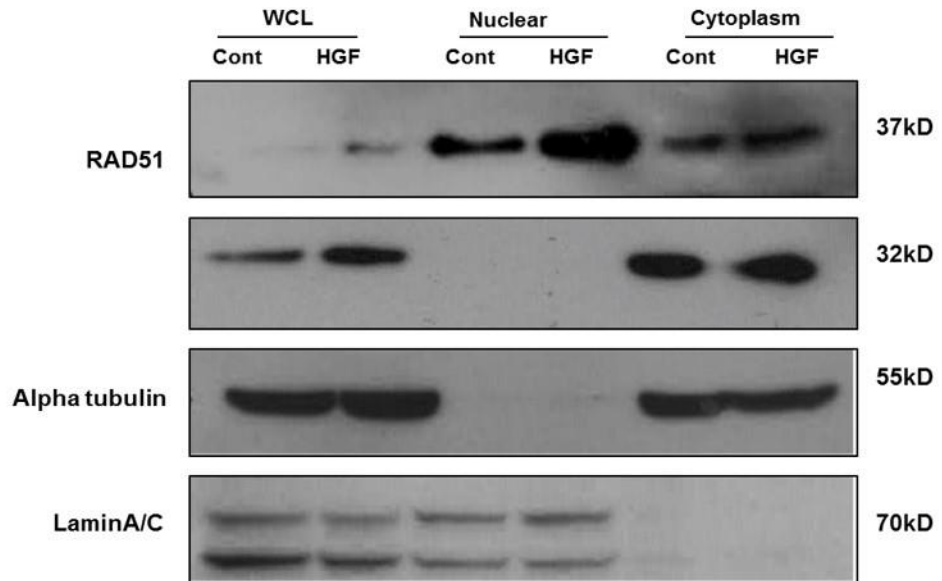

A Western blotting of cytosol and nuclear fractionation after HGF treatment.

A. Diagram showing the binding sites of mtDNA-specific primers.

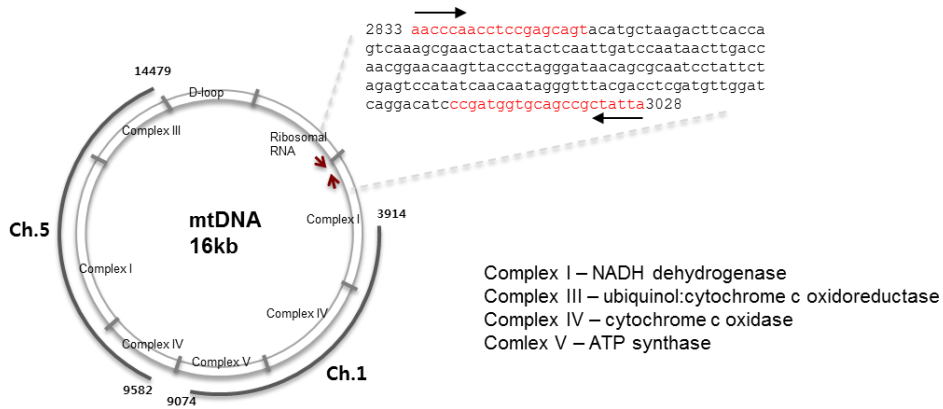

|                                            | Primer             | Sequence 5'-3'        |
|--------------------------------------------|--------------------|-----------------------|
| mtDNA                                      | mtDNA 2833 Forward | aaccaacctccgagcagt    |
|                                            | mtDNA 3028 Reverse | taatagcggctgcaccatcgg |
| nuclearDNA<br>(one copy gene) <sup>#</sup> | AIB1 Forward       | gagtttcctggacaaatgag  |
|                                            | AIB1 Reverse       | cattgttcatatctctggcg  |

B. Scheme of the experimental procedure used for CytoChIP

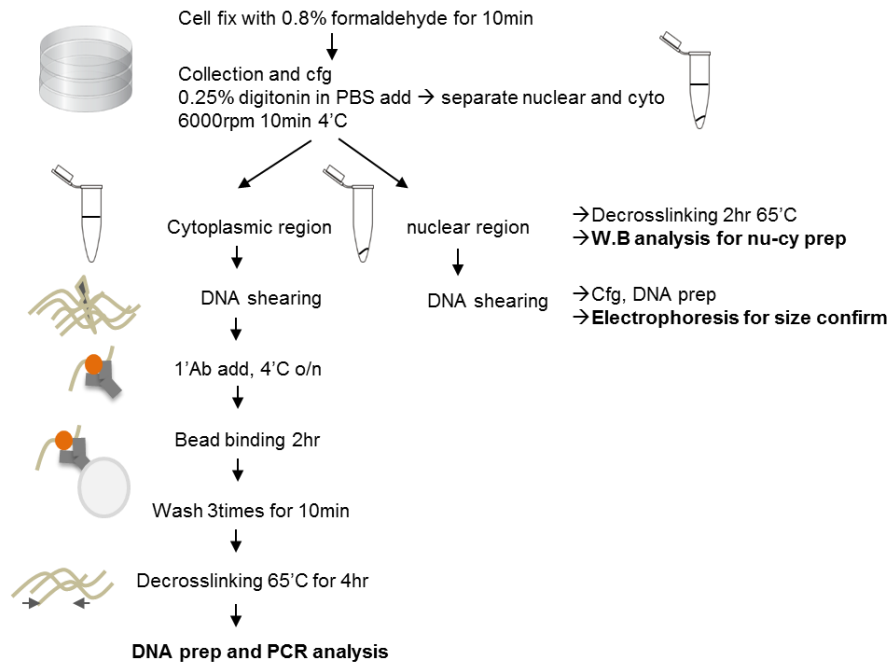



C.

Diagram showing the primers used to detect the D-loop and ND-2 regions

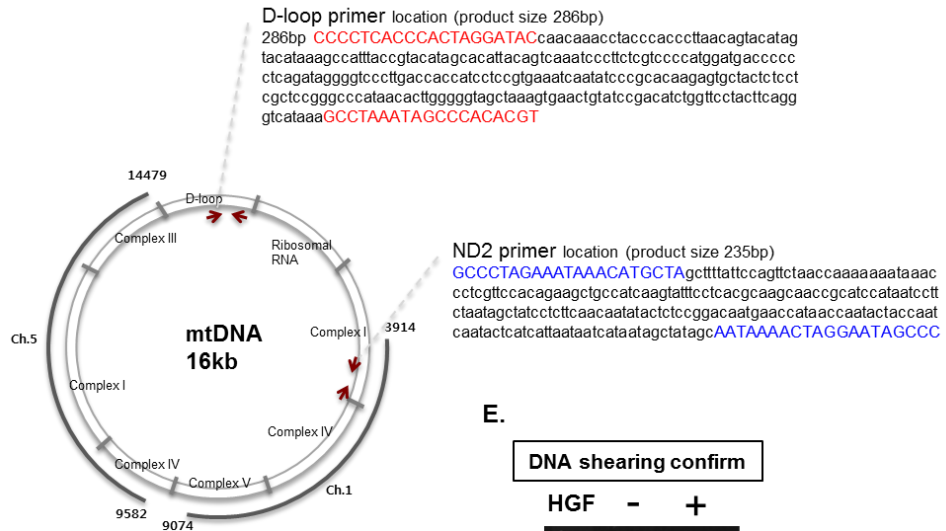

D.

Nu/Cy prep confirm by WB

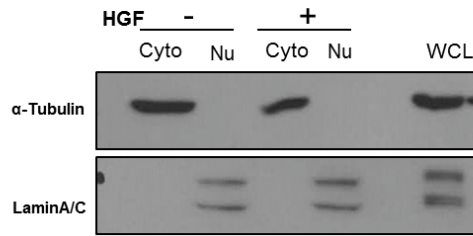

E.

DNA shearing confirm

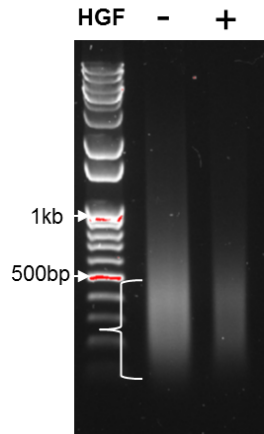

F.

Real-Time PCR

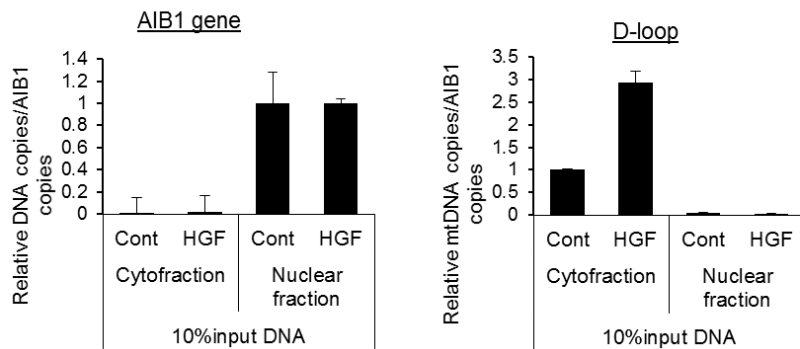

- A** Diagram showing the binding sites of mtDNA-specific primers. mtDNA-specific primer designed on the region except of matching with chromosomal DNA. Their sequences are showed in the table. AIB1 was chosen as a typical single copy in genomic DNA.
- B** Scheme of the experimental procedure used for CytoChIP.
- C** Diagram showing the primers used to detect the D-loop and ND-2 regions.
- D** Western blotting confirmed the generation of cytoplasmic and nuclear fractions. WCL, whole cell lysate.
- E** DNA was sheared into fragments of 100–500 bp(denoted by the bracket), which covered length of PCR product.
- F** Real-time PCR analysis of nuclear and mtDNA markers to validate separation of the cytoplasmic and nuclear fractions using 10% of each fraction. AIB1 was used as the nuclear marker and the D-loop region was used as the cytoplasmic and mtDNA marker.
